# Supplementary material for: How does the ligand affect the sensitivity of the luminescent thermometers based on Tb–Eu complexes
Source: Royal Society of Chemistry journal article supplement (doi:10.1039/d0dt02238a), 2020-01-01

# How does the ligand affect the sensitivity of luminescent thermometers based on Tb-Eu complexes

*Theodore Yu. Popelensky<sup>a</sup>, Valentina V. Utochnikova<sup>a\*</sup>*

<sup>a</sup>Lomonosov Moscow State University, Department of Mathematics and Mechanics, Leninskie Gory, 1,  
119991, Moscow, Russian Federation

<sup>b</sup>Lomonosov Moscow State University, Department of Chemistry, Department of Material Sciences,  
Leninskie Gory, 1/3, 119991, Moscow, Russian Federation

\* [valentina.utochnikova@gmail.com](mailto:valentina.utochnikova@gmail.com)

## Contents

LIR and Sr simulation      2

Case study      6

Detailed study of literature EuxTb1-xL systems      21

## LIR and Sr simulation

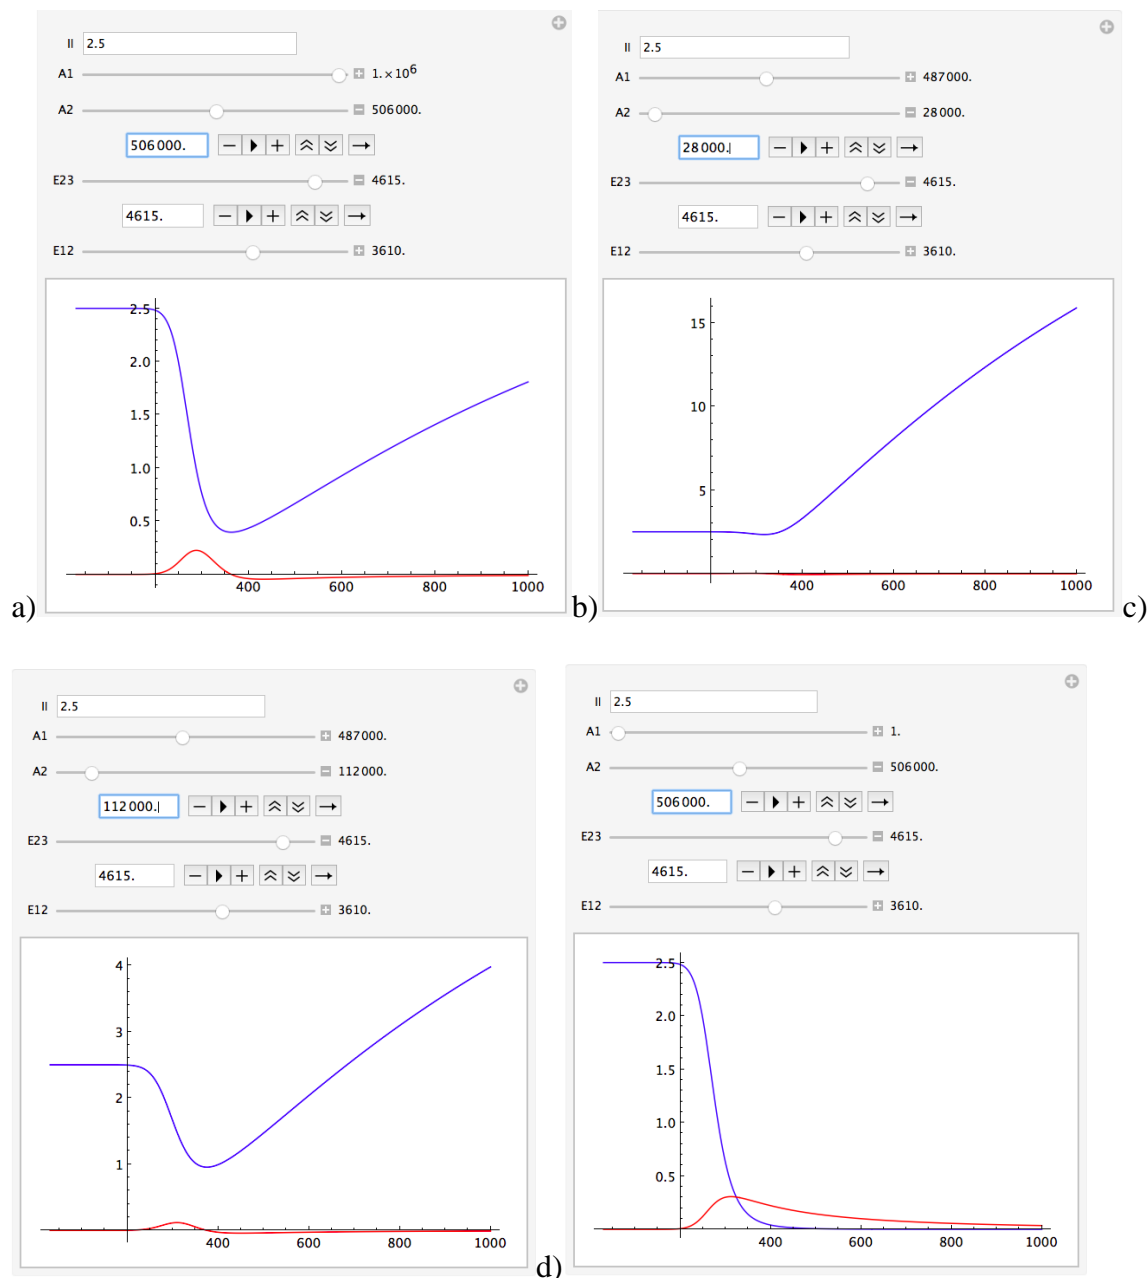

**Fig. S1** The possible LIR and Sr dependencies on T. Illustrations are given for  $E_{12} = 3601$ ,  $E_{23} = 4615$ :

a)  $A_1 = 10^6$ ,  $A_2 = 506000$ , b)  $A_1 = 487000$ ,  $A_2 = 28000$ , c)  $A_1 = 487000$ ,  $A_2 = 112000$ , d)  $A_1 = 1$ ,  $A_2 = 506000$ .

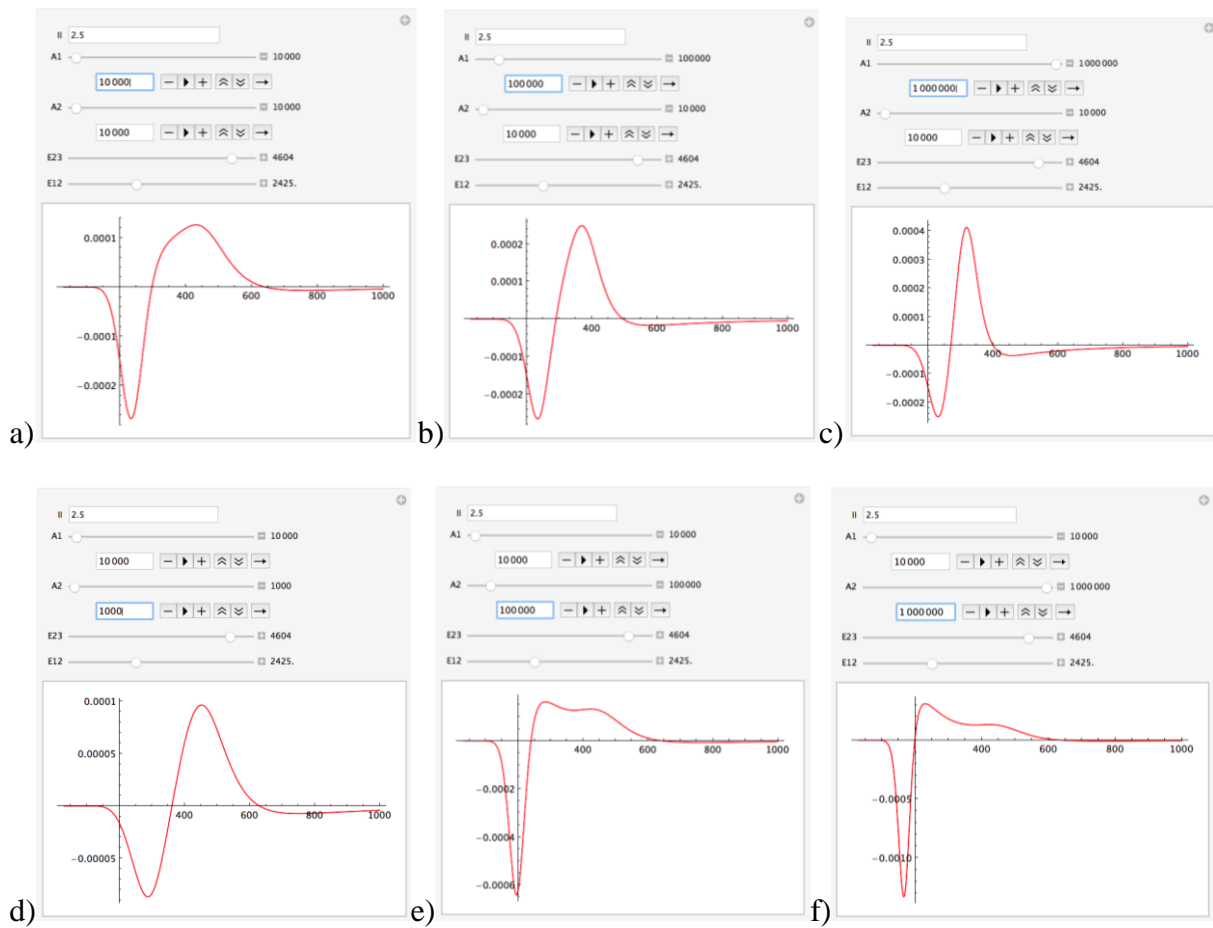

**Fig. S2**  $T_{\max}$  dependence on a-c) A1 value, a,d-f) A2 value

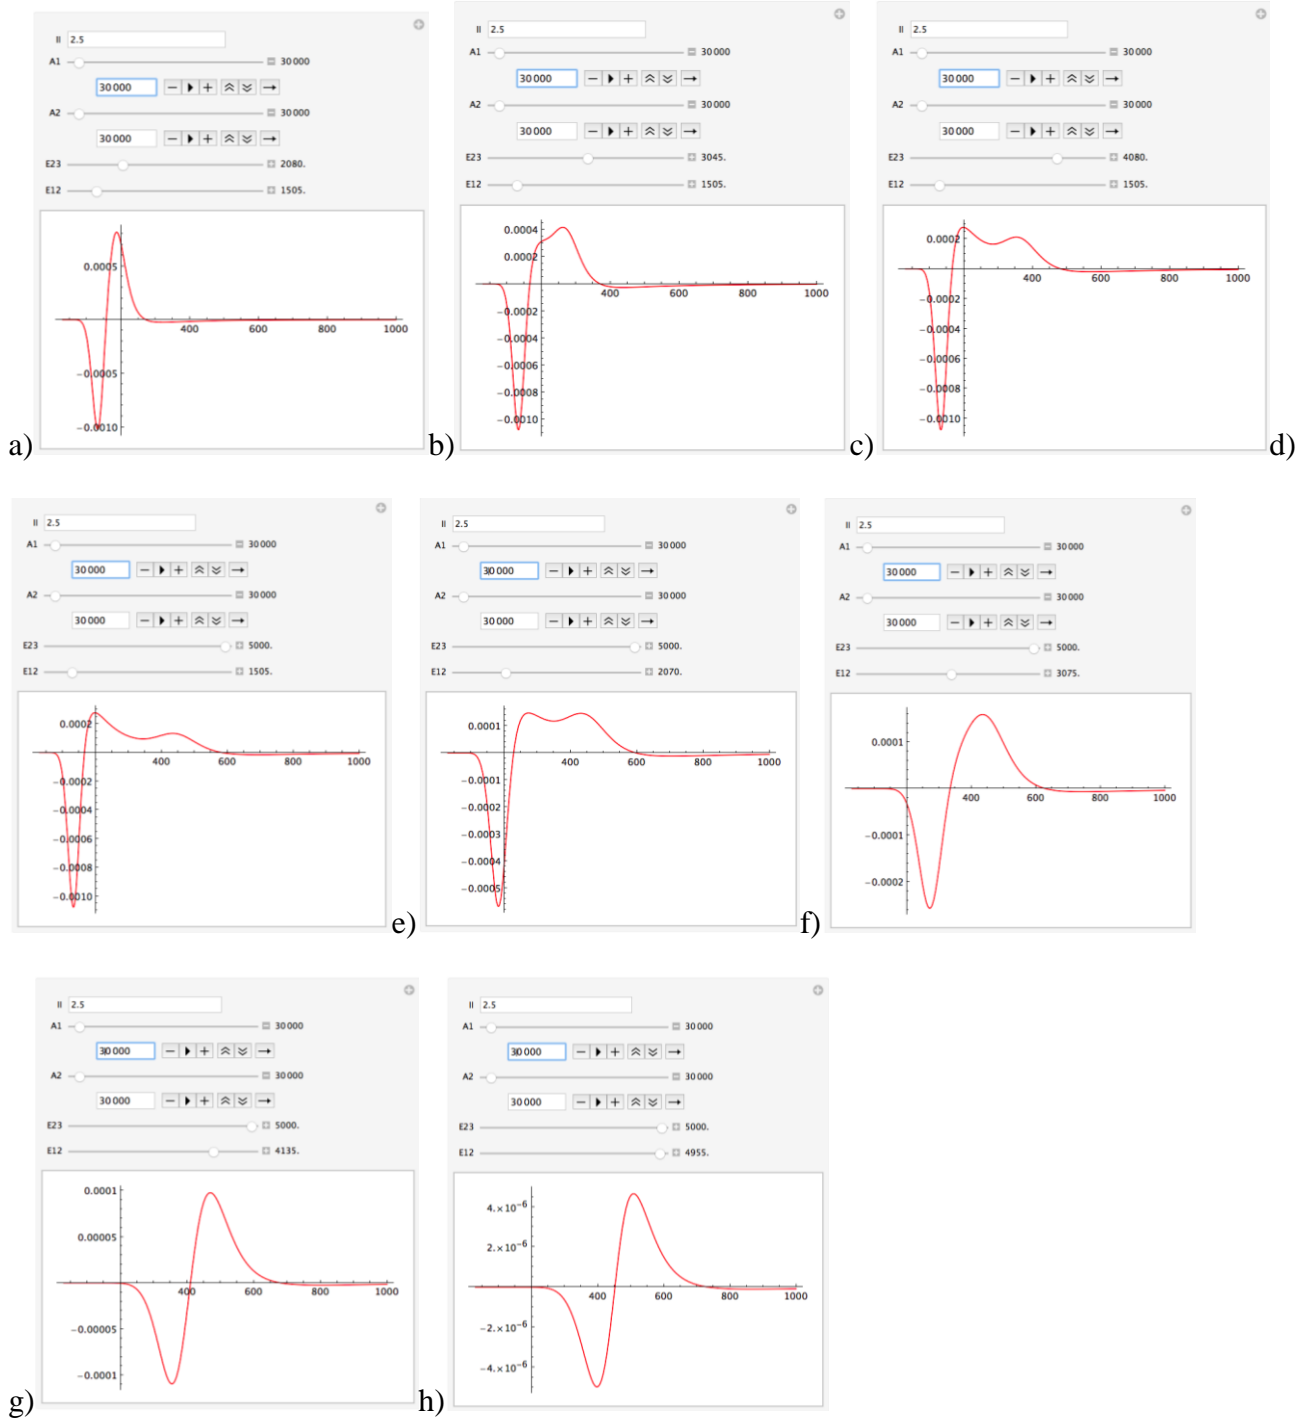

**Fig. S3**  $T_{max}$  dependence on a-d) E23 value, d-h) E12 value

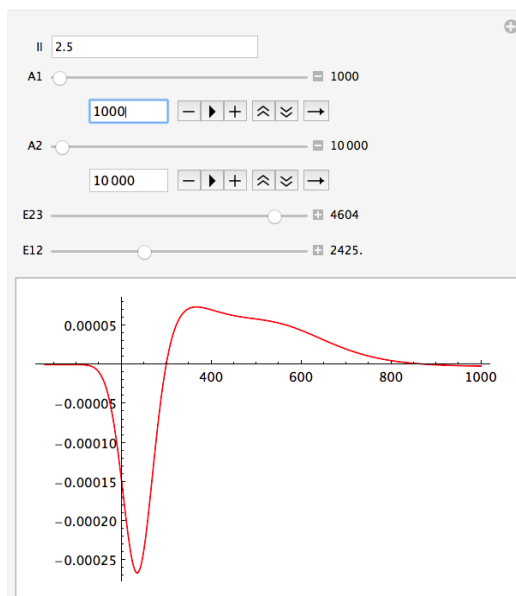

**Fig. S1** Searching for the A2-E12 dependence to give  $T_{maz} = 312K$  at  $E_{23}$  fixed at 4604 K and a voluntarily selected  $A1=1000$

## Case study

### Case (4,5)

$$S_{45} = \frac{A_1(E_{23} - E_{12})}{(A_1 + \exp(E_{12}/T))T^2} = \frac{A_1}{A_1 + \exp(E_{12}/T)} \times S_{55}$$

$$\exp(E_{12}/T) > 0$$

$$A_1 + \exp(E_{12}/T) > A_1$$

$$\frac{A_1}{A_1 + \exp(E_{12}/T)} < 1$$

$$S_{45} < S_{55}$$

### Case (5,4)

$$S_{54} = \frac{A_2(E_{23} - E_{12})}{(A_2 + \exp(E_{23}/T))T^2} = \frac{A_2}{A_2 + \exp(E_{23}/T)} \times S_{55} < S_{55}$$

### Case (4,4)

$$S_{44} = \frac{A_1 A_2 (E_{23} - E_{12})}{(A_2 + \exp(E_{23}/T))(A_1 + \exp(E_{12}/T))T^2} = \frac{A_1 A_2}{(A_2 + \exp(E_{23}/T))(A_1 + \exp(E_{12}/T))} \times S_{55} < S_{55}$$

### Case (3,5)

$$S_{34} = \frac{A_1(E_{23} - E_{12})}{\exp(E_{12}/T)T^2} = \frac{A_1}{\exp(E_{12}/T)} \times S_{55} < S_{55}$$

### Case (5,3)

$$S_{43} = \frac{A_2(E_{23} - E_{12})}{\exp(E_{23}/T)T^2} = \frac{A_2}{\exp(E_{23}/T)} \times S_{55} < S_{55}$$

**Case (3,4)**

$$S_{34} = \frac{A_1 A_2 (E_{23} - E_{12})}{(A_2 + \exp(E_{23}/T)) \exp(E_{12}/T) T^2} = \frac{A_1 A_2}{(A_2 + \exp(E_{23}/T)) \exp(E_{12}/T)} \times S_{55} < S_{55}$$

**Case (4,3)**

$$S_{43} = \frac{A_1 A_2 (E_{23} - E_{12})}{(A_1 + \exp(E_{12}/T)) \exp(E_{23}/T) T^2} = \frac{A_1 A_2}{(A_1 + \exp(E_{12}/T)) \exp(E_{23}/T)} \times S_{55} < S_{55}$$

**Case (5,2)**

$$S_{25} = \frac{A_2 E_{23} - E_{12} (\exp(-E_{23}/T) + A_2)}{\exp(E_{23}/T) T^2}$$

**1)  $E_{23} \geq E_{12}$**

$$1a) \frac{A_2 E_{23} - E_{12} (\exp(-E_{23}/T) + A_2)}{\exp(E_{23}/T) T^2} > 0$$

$$\frac{A_2 E_{23} - E_{12} (\exp(-E_{23}/T) + A_2)}{\exp(E_{23}/T) T^2} > \frac{(E_{23} - E_{12})}{T^2}$$

$$A_2 E_{23} - E_{12} (\exp(-E_{23}/T) + A_2) > E_{23} \exp(E_{23}/T) - E_{12} \exp(E_{23}/T)$$

$$A_2 (E_{23} - E_{12}) > E_{23} \exp(E_{23}/T)$$

$$(E_{23} - E_{12})/E_{23} > \exp(E_{23}/T)/A_2$$

$$1 - E_{12}/E_{23} > \exp(E_{23}/T)/A_2$$

Since  $A_1 \gg \exp(E_{12}/T)$  and  $A_2 \sim \exp(-E_{23}/T) \ll \exp(E_{23}/T)$

$$\exp(E_{23}/T)/A_2 \sim 0$$

Thus  $S_{25} > S_{55}$  requires

$$\begin{cases} E_{12} \approx E_{23} \\ \exp(-E_{23}/T) \approx 0 \end{cases}$$

$$1b) \frac{A_2 E_{23} - E_{12} (\exp(-E_{23}/T) + A_2)}{\exp(E_{23}/T) T^2} < 0$$

$$\frac{E_{12} (\exp(-E_{23}/T) + A_2) - A_2 E_{23}}{\exp(E_{23}/T) T^2} > \frac{(E_{23} - E_{12})}{T^2}$$

$$E_{12} (\exp(-E_{23}/T) + A_2) - A_2 E_{23} > (E_{23} \exp(E_{23}/T) - E_{12} \exp(E_{23}/T))$$

$$E_{12} \exp(-E_{23}/T) > (E_{23} - E_{12}) (\exp(E_{23}/T) - A_2) \approx (E_{23} - E_{12}) \exp(E_{23}/T)$$

$$\exp(-2E_{23}/T) > \frac{E_{23}}{E_{12}} - 1$$

Thus  $S_{25} > S_{55}$  requires  $E_{12} \approx E_{23}$

$$E_{23} \leq E_{12}$$

$$2a) \frac{A_2 E_{23} - E_{12} (\exp(-E_{23}/T) + A_2)}{\exp(E_{23}/T) T^2} < 0$$

$$A_2 E_{23} - E_{12} (\exp(-E_{23}/T) + A_2) > (E_{23} - E_{12}) \exp(E_{23}/T)$$

$$A_2 (E_{23} - E_{12}) - E_{12} \exp(-E_{23}/T) > (E_{12} - E_{23}) \exp(E_{23}/T)$$

$$(E_{23} - E_{12}) (A_2 + \exp(E_{23}/T)) > E_{12} \exp(-E_{23}/T)$$



$$(E_{23} - E_{12}) \exp(E_{23}/T) > E_{12} \exp(-E_{23}/T)$$

$$\frac{E_{23}}{E_{12}} - 1 > \exp(-2E_{23}/T)$$

Thus  $S_{25} > S_{55}$  requires

$$\begin{cases} E_{12} \approx E_{23} \\ \exp(-E_{23}/T) \approx 0 \end{cases}$$

$$2b) \frac{A_2 E_{23} - E_{12} (\exp(-E_{23}/T) + A_2)}{\exp(E_{23}/T) T^2} < 0$$

$$E_{12} (\exp(-E_{23}/T) + A_2) - A_2 E_{23} > (E_{23} - E_{12}) \exp(E_{23}/T)$$

$$A_2 (E_{12} - E_{23}) > -E_{23} \exp(-E_{23}/T)$$

$$A_2 (E_{23} - E_{12}) < \exp(-E_{23}/T)$$

$$1 - \frac{E_{12}}{E_{23}} < \exp(-E_{23}/T) / A_2$$

Thus  $S_{25} > S_{55}$  requires  $E_{12} \approx E_{23}$

$$\mathbf{E_{23} \leq E_{12}}$$

Thus  $S_{25} > S_{55}$  only if  $E_{12} = E_{23}$ . Let's consider this case.

In this case  $S_{55} = 0$  and

$$\begin{aligned}\max(S_{25}) &= \max\left(\frac{E_{23} (\exp(-E_{12}/T) + A_1) - A_1 E_{12}}{\exp(E_{12}/T) T^2}\right) = \max\left(\frac{E_{12} (\exp(-E_{12}/T) + A_1) - A_1 E_{12}}{\exp(E_{12}/T) T^2}\right) \\ &= \max\left(\frac{E_{12} \exp(-E_{12}/T)}{\exp(E_{12}/T) T^2}\right) = \max\left(\frac{E_{12} \exp(-2E_{12}/T)}{T^2}\right)\end{aligned}$$

$$\exp(-2E_{12}/T) < 1 \Rightarrow$$

$$\max(S_{25}) < \frac{E_{12}}{T^2} = S_{55} (\text{at } E_{23} = 0)$$

So looking for the highest  $S_T$  we should not consider this either.

### Case (2,5)

Similarly,

$$\max(S_{25}) < \max(S_{55})$$

unless  $E_{12} = E_{23}$ , which does not lead to the high sensitivity.

### Case (3,3)

$$S_{33} = \frac{A_1 A_2 (E_{23} - E_{12})}{\exp((E_{12} + E_{23})/T) T^2} = \frac{A_1 A_2}{\exp((E_{12} + E_{23})/T)} \times S_{55} < S_{55}$$

### Case (2,4)

$$S_{24} = \frac{A_2 E_{23} (\exp(-E_{12}/T) + A_1) - A_1 A_2 E_{12}}{(A_2 + \exp(E_{23}/T)) \exp(E_{12}/T) T^2}$$

Let's consider if it is possible that  $S_{24} > S_{55}$ .

- 1) Both are positive. For that

$$\left\{ \begin{array}{l} E_{12} < E_{23} \\ E_{23} (\exp(-E_{12}/T) + A_1) > A_1 E_{12} \end{array} \right.$$

$$\left\{ \begin{array}{l} E_{23} > E_{12} \\ E_{23} > \frac{A_1}{(\exp(-E_{12}/T) + A_1)} E_{12} \end{array} \right.$$

Thus the latter is automatically true if the former is, and the only condition is  $E_{23} > E_{12}$ .

$$S_{24} = \frac{A_2 E_{23} (\exp(-E_{12}/T) + A_1) - A_1 A_2 E_{12}}{(A_2 + \exp(E_{23}/T)) \exp(E_{12}/T) T^2} > \frac{(E_{23} - E_{12})}{T^2} = S_{55}$$

$$\begin{aligned} A_2 (\exp(-E_{12}/T) + A_1) E_{23} + (A_2 + \exp(E_{23}/T)) \exp(E_{12}/T) E_{12} \\ > A_1 A_2 E_{12} + (A_2 + \exp(E_{23}/T)) \exp(E_{12}/T) E_{23} \end{aligned}$$

$$\begin{aligned} E_{23} (A_2 (\exp(-E_{12}/T) + A_1) - (A_2 + \exp(E_{23}/T)) \exp(E_{12}/T)) \\ > E_{12} (A_1 A_2 - (A_2 + \exp(E_{23}/T)) \exp(E_{12}/T)) \end{aligned}$$

As  $A_2 \sim (A_2 + \exp(E_{23}/T))$  and  $(\exp(-E_{12}/T) + A_1) \ll \exp(E_{12}/T)$ ,

$$A_2 (\exp(-E_{12}/T) + A_1) - (A_2 + \exp(E_{23}/T)) \exp(E_{12}/T) \approx -(A_2 + \exp(E_{23}/T)) \exp(E_{12}/T)$$

And as  $(A_2 + \exp(E_{23}/T)) \sim A_2$  and  $\exp(E_{12}/T) \gg A_1$

$$A_1 A_2 - (A_2 + \exp(E_{23}/T)) \exp(E_{12}/T) \approx -(A_2 + \exp(E_{23}/T)) \exp(E_{12}/T)$$

From that

$$\begin{aligned} E_{23} (A_2 (\exp(-E_{12}/T) + A_1) - (A_2 + \exp(E_{23}/T)) \exp(E_{12}/T)) \\ > E_{12} (A_1 A_2 - (A_2 + \exp(E_{23}/T)) \exp(E_{12}/T)) \end{aligned}$$

is equal to

$$\mathbf{E}_{23}(- (A_2 + \exp(E_{23}/T)) \exp(E_{12}/T)) > \mathbf{E}_{12}(- (A_2 + \exp(E_{23}/T)) \exp(E_{12}/T))$$

$$\mathbf{E}_{23}(A_2 + \exp(E_{23}/T)) \exp(E_{12}/T) < \mathbf{E}_{12}(A_2 + \exp(E_{23}/T)) \exp(E_{12}/T)$$

Meaning that  $\mathbf{S}_{24} > \mathbf{S}_{55} \Leftrightarrow \mathbf{E}_{12} > \mathbf{E}_{23}$ , which contradicts the condition.

2) **Both are negative: For that  $\mathbf{E}_{23} < \mathbf{E}_{12} \frac{A_1}{(\exp(-E_{12}/T) + A_1)}$  (and automatically  $< \mathbf{E}_{12}$ )**

$$\mathbf{S}_{24} = \frac{A_1 A_2 \mathbf{E}_{12} - A_2 \mathbf{E}_{23} (\exp(-E_{12}/T) + A_1)}{(A_2 + \exp(E_{23}/T)) \exp(E_{12}/T) T^2} > \frac{(\mathbf{E}_{12} - \mathbf{E}_{23})}{T^2} = \mathbf{S}_{55}$$

$$\begin{aligned} A_1 A_2 \mathbf{E}_{12} + \mathbf{E}_{23} (A_2 + \exp(E_{23}/T)) \exp(E_{12}/T) \\ > A_2 \mathbf{E}_{23} (\exp(-E_{12}/T) + A_1) + \mathbf{E}_{12} (A_2 + \exp(E_{23}/T)) \exp(E_{12}/T) \end{aligned}$$

$$\begin{aligned} \mathbf{E}_{12} (A_1 A_2 - (A_2 + \exp(E_{23}/T)) \exp(E_{12}/T)) \\ > \mathbf{E}_{23} (A_2 (\exp(-E_{12}/T) + A_1) - (A_2 + \exp(E_{23}/T)) \exp(E_{12}/T)) \end{aligned}$$

Again, this is equal to

$$\mathbf{E}_{12} (- (A_2 + \exp(E_{23}/T)) \exp(E_{12}/T)) > \mathbf{E}_{23} (- (A_2 + \exp(E_{23}/T)) \exp(E_{12}/T))$$

$$\mathbf{E}_{12} (A_2 + \exp(E_{23}/T)) \exp(E_{12}/T) < \mathbf{E}_{23} (A_2 + \exp(E_{23}/T)) \exp(E_{12}/T)$$

$$\mathbf{E}_{12} < \mathbf{E}_{23}$$

which contradicts to the conditions.

3)  $\mathbf{S}_{55} < 0 < \mathbf{S}_{24}$ . For that

$$E_{12} > E_{23} > E_{12} \frac{A_1}{(\exp(-E_{12}/T) + A_1)}$$

The conditions of  $S_{24} < S_{55}$  is

$$S_{24} = \frac{A_2 E_{23} (\exp(-E_{12}/T) + A_1) - A_1 A_2 E_{12}}{(A_2 + \exp(E_{23}/T)) \exp(E_{12}/T) T^2} > \frac{(E_{12} - E_{23})}{T^2} = S_{55}$$

$$\begin{aligned} E_{23} (A_2 (\exp(-E_{12}/T) + A_1) + (A_2 + \exp(E_{23}/T)) \exp(E_{12}/T)) \\ > ((A_2 + \exp(E_{23}/T)) \exp(E_{12}/T) + A_1 A_2) E_{12} \end{aligned}$$

Similarly equal to

$$E_{23} (A_2 + \exp(E_{23}/T)) \exp(E_{12}/T) > (A_2 + \exp(E_{23}/T)) \exp(E_{12}/T) E_{12}$$

$$E_{23} > E_{12}$$

which contradicts to the conditions.

**Case (4,2)**

Similarly, always

$$S_{42} = \frac{A_1 A_2 E_{23} - A_1 E_{12} (\exp(-E_{23}/T) + A_2)}{\exp(E_{23}/T) (A_1 + \exp(E_{12}/T)) T^2} < \frac{(E_{23} - E_{12})}{T^2} = S_{55}$$

**Case (1,5)**

$$\begin{aligned} S_{15} - S_{55} &= \frac{E_{23} \exp(-E_{12}/T) - A_1 E_{12}}{\exp(E_{12}/T) T^2} - \frac{(E_{23} - E_{12})}{T^2} \\ &= \frac{1}{\exp(E_{12}/T) T^2} \left( E_{23} (\exp(-E_{12}/T) - \exp(E_{12}/T)) - E_{12} (A_1 - \exp(E_{12}/T)) \right) \\ &\approx \frac{1}{\exp(E_{12}/T) T^2} \left( -E_{23} (\exp(E_{12}/T)) + E_{12} (\exp(E_{12}/T)) \right) = \frac{E_{12} - E_{23}}{T^2} = -S_{55} \\ &< 0 \end{aligned}$$

Thus again it is always that

$$S_{15} = \frac{E_{23} \exp(-E_{12}/T) - A_1 E_{12}}{\exp(E_{12}/T) T^2} < \frac{(E_{23} - E_{12})}{T^2} = S_{55}$$

**Case (5,1)**

Similarly,

$$S_{51} = \frac{A_2 E_{23} - E_{12} \exp(-E_{23}/T)}{\exp(E_{23}/T) T^2} < \frac{(E_{23} - E_{12})}{T^2} = S_{55}$$

**Case (1,4)**

$$\begin{aligned}
S_{14} - S_{55} &= \frac{A_2 E_{23} \exp(-E_{12}/T) - A_1 A_2 E_{12}}{(A_2 + \exp(E_{23}/T)) \exp(E_{12}/T) T^2} - \frac{(E_{23} - E_{12})}{T^2} \\
&= \frac{1}{(A_2 + \exp(E_{23}/T)) \exp(E_{12}/T) T^2} \left( E_{23} (A_2 \exp(-E_{12}/T)) \right. \\
&\quad \left. - (A_2 + \exp(E_{23}/T)) \exp(E_{12}/T) - E_{12} (A_1 A_2 - (A_2 + \exp(E_{23}/T)) \exp(E_{12}/T)) \right) \\
&\approx \frac{1}{(A_2 + \exp(E_{23}/T)) \exp(E_{12}/T) T^2} \left( -E_{23} (A_2 + \exp(E_{23}/T)) \exp(E_{12}/T) \right. \\
&\quad \left. + E_{12} (A_2 + \exp(E_{23}/T)) \exp(E_{12}/T) \right) = \frac{E_{12} - E_{23}}{T^2} = -S_{55} < 0
\end{aligned}$$

Thus again it is always that

$$S_{14} = \frac{A_2 E_{23} \exp(-E_{12}/T) - A_1 A_2 E_{12}}{(A_2 + \exp(E_{23}/T)) \exp(E_{12}/T) T^2} < \frac{(E_{23} - E_{12})}{T^2} = S_{55}$$

**Case (4,1)**

Similarly,

$$S_{41} = \frac{A_2 E_{23} \exp(-E_{12}/T) - A_1 A_2 E_{12}}{(A_2 + \exp(E_{23}/T)) \exp(E_{12}/T) T^2} < \frac{(E_{23} - E_{12})}{T^2} = S_{55}$$

**Case(2,3)**

$$S_{23} = \frac{A_2 E_{23} (\exp(-E_{12}/T) + A_1) - A_1 A_2 E_{12}}{\exp(E_{12} + E_{23}/T) T^2}$$

$$\begin{aligned}
S_{23} - S_{55} &= \frac{A_2 E_{23} (\exp(-E_{12}/T) + A_1) - A_1 A_2 E_{12}}{\exp(E_{12} + E_{23}/T) T^2} - \frac{(E_{23} - E_{12})}{T^2} \\
&= \frac{1}{\exp(E_{12} + E_{23}/T) T^2} \left( E_{23} (A_2 \exp(-E_{12}/T) + A_1 A_2 - \exp(E_{12} + E_{23}/T)) \right. \\
&\quad \left. - E_{12} (A_1 A_2 - \exp(E_{12} + E_{23}/T)) \right) \\
&\approx \frac{1}{\exp(E_{12} + E_{23}/T) T^2} \left( E_{23} (-\exp(E_{12} + E_{23}/T)) - E_{12} (-\exp(E_{12} + E_{23}/T)) \right) \\
&= \frac{E_{12} - E_{23}}{T^2} = -S_{55} < 0
\end{aligned}$$

Thus always

$$S_{23} = \frac{A_2 E_{23} (\exp(-E_{12}/T) + A_1) - A_1 A_2 E_{12}}{\exp(E_{12} + E_{23}/T) T^2} < \frac{(E_{23} - E_{12})}{T^2} = S_{55}$$

**Case (3,2)**

Similarly,

$$S_{32} = \frac{A_1 A_2 E_{23} - A_1 E_{12} (\exp(-E_{23}/T) + A_2)}{\exp(E_{12} + E_{23}/T) T^2} < \frac{(E_{23} - E_{12})}{T^2} = S_{55}$$

**Case (1,3)**

$$S_{13} = \frac{A_2 E_{23} \exp(-E_{12}/T) - A_1 A_2 E_{12}}{(\exp(E_{23} + E_{12}/T)) T^2}$$



$$\begin{aligned}
S_{13} - S_{55} &= \frac{A_2 E_{23} \exp\left(-\frac{E_{12}}{T}\right) - A_1 A_2 E_{12}}{\left(\exp\left(\frac{E_{23} + E_{12}}{T}\right)\right) T^2} - \frac{(E_{23} - E_{12})}{T^2} \\
&= \frac{1}{\left(\exp\left(\frac{E_{23} + E_{12}}{T}\right)\right) T^2} \left( E_{23} \left( A_2 \exp\left(-\frac{E_{12}}{T}\right) - \exp\left(\frac{E_{23} + E_{12}}{T}\right) \right) \right. \\
&\quad \left. - E_{12} \left( A_1 A_2 - \exp\left(\frac{E_{23} + E_{12}}{T}\right) \right) \right) \\
&\approx \frac{1}{\left(\exp\left(\frac{E_{23} + E_{12}}{T}\right)\right) T^2} \left( E_{23} \left( -\exp\left(\frac{E_{23} + E_{12}}{T}\right) \right) - E_{12} \left( -\exp\left(\frac{E_{23} + E_{12}}{T}\right) \right) \right) \\
&= \frac{E_{12} - E_{23}}{T^2} = -S_{55} < 0
\end{aligned}$$

Thus

$$S_{13} = \frac{A_2 E_{23} \exp\left(-\frac{E_{12}}{T}\right) - A_1 A_2 E_{12}}{\left(\exp\left(\frac{E_{23} + E_{12}}{T}\right)\right) T^2} < \frac{(E_{23} - E_{12})}{T^2} = S_{55}$$

**Case (3,1)**

Similarly,

$$S_{31} = \frac{A_1 A_2 E_{23} - A_1 E_{12} \exp\left(-\frac{E_{23}}{T}\right)}{\exp\left(\frac{E_{12} + E_{23}}{T}\right) T^2} < \frac{(E_{23} - E_{12})}{T^2} = S_{55}$$

**Case (2,2)**

$$S_{22} = \frac{A_2 E_{23} \left( \exp\left(-\frac{E_{12}}{T}\right) + A_1 \right) - A_1 E_{12} \left( \exp\left(-\frac{E_{23}}{T}\right) + A_2 \right)}{\exp\left(\frac{E_{12} + E_{23}}{T}\right) T^2}$$

$$\begin{aligned}
S_{22} - S_{55} &= \frac{A_2 E_{23} (\exp(-E_{12}/T) + A_1) - A_1 E_{12} (\exp(-E_{23}/T) + A_2)}{\exp(E_{12} + E_{23}/T) T^2} - \frac{(E_{23} - E_{12})}{T^2} \\
&= \frac{1}{\exp(E_{12} + E_{23}/T) T^2} \left( E_{23} (A_2 (\exp(-E_{12}/T) + A_1) - \exp(E_{12} + E_{23}/T)) \right. \\
&\quad \left. - E_{12} (A_1 (\exp(-E_{23}/T) + A_2) - \exp(E_{12} + E_{23}/T)) \right) \\
&\approx \frac{1}{\exp(E_{12} + E_{23}/T) T^2} \left( E_{23} (-\exp(E_{12} + E_{23}/T)) - E_{12} (-\exp(E_{12} + E_{23}/T)) \right) \\
&= \frac{E_{12} - E_{23}}{T^2} = -S_{55} < 0
\end{aligned}$$

Thus it is always that

$$S_{22} = \frac{A_2 E_{23} (\exp(-E_{12}/T) + A_1) - A_1 E_{12} (\exp(-E_{23}/T) + A_2)}{\exp(E_{12} + E_{23}/T) T^2} < \frac{(E_{23} - E_{12})}{T^2} = S_{55}$$

**Case (1,2)**

$$S_{12} = \frac{A_2 E_{23} \exp(-E_{12}/T) - A_1 E_{12} (\exp(-E_{23}/T) + A_2)}{(\exp(E_{23} + E_{12}/T)) T^2}$$

$$\begin{aligned}
S_{12} - S_{55} &= \frac{A_2 E_{23} \exp(-E_{12}/T) - A_1 E_{12} (\exp(-E_{23}/T) + A_2)}{(\exp(E_{23} + E_{12}/T)) T^2} - \frac{(E_{23} - E_{12})}{T^2} \\
&= \frac{1}{\exp(E_{12} + E_{23}/T) T^2} \left( E_{23} (A_2 \exp(-E_{12}/T) - \exp(E_{12} + E_{23}/T)) \right. \\
&\quad \left. - E_{12} (A_1 (\exp(-E_{23}/T) + A_2) - \exp(E_{12} + E_{23}/T)) \right) \\
&\approx \frac{1}{\exp(E_{12} + E_{23}/T) T^2} \left( E_{23} (-\exp(E_{12} + E_{23}/T)) - E_{12} (-\exp(E_{12} + E_{23}/T)) \right) \\
&= \frac{E_{12} - E_{23}}{T^2} = -S_{55} < 0
\end{aligned}$$

Thus it is always that

$$S_{12} = \frac{A_2 E_{23} \exp(-E_{12}/T) - A_1 E_{12} (\exp(-E_{23}/T) + A_2)}{(\exp(E_{23} + E_{12}/T)) T^2} < \frac{(E_{23} - E_{12})}{T^2} = S_{55}$$

**Case (2,1)**

Similarly,

$$S_{21} = \frac{A_2 E_{23} (\exp(-E_{12}/T) + A_1) - A_1 E_{12} \exp(-E_{23}/T)}{\exp(E_{12} + E_{23}/T) T^2} < \frac{(E_{23} - E_{12})}{T^2} = S_{55}$$

**Case (1,1)**

$$S_{11} = \frac{A_2 E_{23} \exp(-E_{12}/T) - A_1 E_{12} \exp(-E_{23}/T)}{(\exp(E_{23} + E_{12}/T)) T^2}$$

$$\begin{aligned}
S_{11} - S_{55} &= \frac{A_2 E_{23} \exp(-E_{12}/T) - A_1 E_{12} \exp(-E_{23}/T)}{(\exp(E_{23} + E_{12}/T))T^2} - \frac{(E_{23} - E_{12})}{T^2} \\
&= \frac{1}{\exp(E_{12} + E_{23}/T)T^2} \left( E_{23} (A_2 \exp(-E_{12}/T) - \exp(E_{12} + E_{23}/T)) \right. \\
&\quad \left. - E_{12} (A_1 \exp(-E_{23}/T) - \exp(E_{12} + E_{23}/T)) \right) \\
&\approx \frac{1}{\exp(E_{12} + E_{23}/T)T^2} \left( E_{23} (-\exp(E_{12} + E_{23}/T)) - E_{12} (-\exp(E_{12} + E_{23}/T)) \right) \\
&= \frac{E_{12} - E_{23}}{T^2} = -S_{55} < 0
\end{aligned}$$

Thus again always

$$S_{11} = \frac{A_2 E_{23} \exp(-E_{12}/T) - A_1 E_{12} \exp(-E_{23}/T)}{(\exp(E_{23} + E_{12}/T))T^2} < \frac{(E_{23} - E_{12})}{T^2} = S_{55}$$

## Detailed study of literature $\text{Eu}_x\text{Tb}_{1-x}\text{L}$ systems

Table S1 Relative thermometer sensitivity of some  $\text{Eu}_x\text{Tb}_{1-x}\text{L}$  systems and triplet state energy of L ligands.

| № | link | $\text{Eu}_x\text{Tb}_{1-x}\text{L}$                                                     | $E(T_1)$ ,<br>$\text{cm}^{-1}$ | T, K | $S_r, \%K^{-1}$ |                      |                                    | $\text{Exp}(E_2$<br>$_{3/T})$ | $A_2$  | $\text{Exp}(E_{12}/$<br>$T)$ | $A_1$   | Case       |
|---|------|------------------------------------------------------------------------------------------|--------------------------------|------|-----------------|----------------------|------------------------------------|-------------------------------|--------|------------------------------|---------|------------|
|   |      |                                                                                          |                                |      | exp             | $\frac{E_{12}}{T^2}$ | $\frac{E_{23} - E_{12}}{T^2}$      |                               |        |                              |         |            |
| 1 | 28   | pdms-eddpo(1%)-<br>[Tb <sub>0,90</sub> Eu <sub>0,10</sub> (bzac) <sub>3</sub> ](0,25%)   | 23058                          | 203  | <b>11,05</b>    | <b>11,17232</b>      | <b>1,89315</b>                     | 1,52E8                        | 8,85E8 | 7,07E9                       | 4,13E10 | <b>5,5</b> |
| 2 | 28   | pdms-eddpo(1%)-<br>[Tb <sub>0,95</sub> Eu <sub>0,05</sub> (bzac) <sub>3</sub> ](0,25%)   |                                | 188  | <b>9,22</b>     | <b>13,02626</b>      | <b>2,2073</b>                      | 6,81E8                        | 2,84E9 | 4,32E10                      | 1,80E11 | <b>5,5</b> |
| 3 | 28   | pdms-eddpo(1%)-<br>[Tb <sub>0,99</sub> Eu <sub>0,01</sub> (bzac) <sub>3</sub> ](0,25%)   |                                | 203  | <b>7,87</b>     | <b>11,17232</b>      | <b>1,89315</b>                     | 1,52E8                        | 6,30E8 | 7,07E9                       | 2,94E10 | <b>4,5</b> |
| 4 | 28   | pdms-eddpo(1%)-<br>[Tb <sub>0,995</sub> Eu <sub>0,005</sub> (bzac) <sub>3</sub> ](0,25%) |                                | 203  | <b>7,72</b>     | <b>11,17232</b>      | <b>1,89315</b>                     | 1,52E8                        | 6,18E8 | 7,07E9                       | 2,88E10 | <b>4,5</b> |
| 5 | 29   | Eu <sub>0,088</sub> Tb <sub>0,2287</sub> (phen)(btc)(dmf)·dmf                            | 22075<br>(phen)                | 393  | <b>2,37</b>     | <b>2,98092</b>       | <b>1,42085</b><br><b>(0,37284)</b> | 2,82E4                        | 1,80E5 | 1,22E5                       | 7,78E5  | <b>3,4</b> |

|    |    |                                                                                                                                       |                               |     |             |                |                                    |             |         |         |        |            |
|----|----|---------------------------------------------------------------------------------------------------------------------------------------|-------------------------------|-----|-------------|----------------|------------------------------------|-------------|---------|---------|--------|------------|
| 6  | 29 | Eu <sub>0,174</sub> Tb <sub>0,2188</sub> (phen)(btc)(dmf)·dmf                                                                         | 23200<br>(btc)                |     | <b>2,71</b> | <b>2,98092</b> | <b>1,42085</b><br><b>(0,37284)</b> | 2,82E4      | 2,05E5  | 1,22E5  | 8,89E5 | <b>3,4</b> |
| 7  | 30 | [Eu <sub>0,53</sub> Tb <sub>0,47</sub> (tfac) <sub>8</sub> ] <sub>2</sub> ·Na <sub>2</sub> <sup>+</sup>                               | 22800                         | 353 | <b>2,70</b> | <b>3,69476</b> | <b>0,92398</b>                     | 1,77E4      | 5,17E4  | 4,62E5  | 1,35E6 | <b>4,5</b> |
| 8  | 30 | [Eu <sub>0,41</sub> Tb <sub>0,59</sub> (tfac) <sub>8</sub> ] <sub>2</sub> ·Na <sub>2</sub> <sup>+</sup>                               | 22800                         | 315 | <b>1,33</b> | <b>4,63996</b> | <b>1,16035</b>                     | 5,76E4      | 6,59E4  | 2,22E6  | 2,55E6 | <b>4,4</b> |
| 9  | 31 | Tb <sub>0,9</sub> Eu <sub>0,1</sub> PIA                                                                                               | 25866                         | 300 | <b>3,53</b> | 5,12           | <b>3,62</b>                        | 7,95E2      | 2,65E4  | 2,46E11 | 8,2E12 | <b>5,5</b> |
| 10 | 32 | Eu <sub>0,0069</sub> Tb <sub>0,9931</sub> -DMBDC                                                                                      | 23306                         | 200 | <b>1,15</b> | 11,51          | <b>1,06</b>                        | 9,95E5      | 8,5E7   | 2,04E6  | 9&65E9 | <b>5,5</b> |
| 11 | 19 | d-U(600)-Eu <sub>0,25</sub> Tb <sub>0,75</sub> (btfa) <sub>3</sub> (bpeta)                                                            | 21793                         | 300 | <b>3,0</b>  | <b>5,11556</b> | <b>2,88915</b>                     | 7,95E2      | 8,26E2  | 4,62E6  | 4,80E6 | <b>4,4</b> |
| 12 | 33 | Eu <sub>0,25</sub> Tb <sub>0,75</sub> (btfa) <sub>3</sub> (4,4'-bpy)(EtOH)                                                            | 22212                         | 225 | <b>4,00</b> | <b>9,09432</b> | <b>3,94543</b>                     | 1,07E5      | 1,09E5  | 7,70E8  | 7,81E8 | <b>4,4</b> |
| 13 | 27 | [(CH <sub>3</sub> ) <sub>2</sub> NH <sub>2</sub> ]Eu <sub>0,036</sub> Tb <sub>0,964</sub> bpfc                                        | 29070                         | 310 | <b>9,42</b> | <b>4,79084</b> | <b>8,1893</b>                      | 2,99E1<br>7 | 3,44E17 | 2,82E6  | 3,24E6 | <b>4,4</b> |
| 14 | 18 | [Eu <sub>0,37</sub> Tb <sub>0,63</sub> (btc)H <sub>2</sub> O](H <sub>2</sub> O)(DMF)                                                  | 23200<br>(26504) <sup>1</sup> | 313 | <b>0,68</b> | <b>4,69945</b> | <b>0,58778</b><br><b>(4,26457)</b> | 1,53E1<br>2 | 2,44E11 | 2,44E6  | 3,90E5 | <b>3,3</b> |
| 15 | 34 | [Tb <sub>2</sub> (bpydc) <sub>3</sub> (H <sub>2</sub> O) <sub>3</sub> ](dmf) <sub>2</sub> @3%Eu(tfac) <sub>3</sub> ·2H <sub>2</sub> O | 21505<br>(bpydc)              | 225 | <b>2,59</b> | <b>9,09432</b> | <b>5,95478</b><br><b>(2,27429)</b> | 4,62E6      | 5,25E6  | 7,70E8  | 8,77E8 | <b>4,4</b> |

|    |    |                                                                                                                                             |                               |     |             |                |                                    |             |         |        |        |            |
|----|----|---------------------------------------------------------------------------------------------------------------------------------------------|-------------------------------|-----|-------------|----------------|------------------------------------|-------------|---------|--------|--------|------------|
| 16 | 34 | [Tb <sub>2</sub> (bpydc) <sub>3</sub> (H <sub>2</sub> O) <sub>3</sub> ](dmf) <sub>2</sub> @7,3%E<br>u(tfac) <sub>3</sub> ·2H <sub>2</sub> O | 22800<br>(tfac)               | 325 | <b>1,33</b> | <b>4,35882</b> | <b>2,85406</b><br><b>(1,09004)</b> | 4,10E4      | 5,01E4  | 1,42E6 | 1,73E6 | <b>4,4</b> |
| 17 | 35 | Tb <sub>0,995</sub> Eu <sub>0,005</sub> @Al(OH)(bpydc)                                                                                      | 21505                         | 333 | <b>3,00</b> | <b>4,1519</b>  | <b>2,71858</b>                     | 1,18E2      | 1,30E2  | 1,01E6 | 1,11E6 | <b>4,4</b> |
| 18 | 23 | Eu <sub>0,01</sub> Tb <sub>0,99</sub> (btc)                                                                                                 | 23200<br>(26504) <sup>1</sup> | 300 | <b>0,42</b> | <b>5,11556</b> | <b>0,63982</b><br><b>(4,64217)</b> | 5,17E1<br>2 | 4,67E11 | 4,62E6 | 4,18E5 | <b>3,3</b> |
| 19 | 36 | [Tb <sub>0,98</sub> Eu <sub>0,02</sub> (oa) <sub>0,5</sub> (dstp)]·3H <sub>2</sub> O <sup>1</sup>                                           | 24570                         | 275 | <b>2,4</b>  | <b>6,08793</b> | <b>1,84505</b>                     | 8,55E-<br>4 | 2,37E-4 | 1,86E7 | 5,17E6 | <b>4,4</b> |
| 21 | 37 | Tb <sub>0,99</sub> Eu <sub>0,01</sub> (bdc) <sub>1,5</sub> ·(H <sub>2</sub> O) <sub>2</sub>                                                 | 26211                         | 318 | <b>0,31</b> | <b>4,55283</b> | <b>3,71463</b>                     | 2,62E1<br>1 | 2,18E10 | 1,94E6 | 1,62E5 | <b>3,3</b> |
| 22 | 38 | [Tb <sub>0,99</sub> Eu <sub>0,01</sub> (hfa) <sub>3</sub> (dpbp)] <sub>2</sub>                                                              | 22000<br>(hfa)                | 200 | <b>0,52</b> | <b>11,51</b>   | <b>5,756</b>                       | 9,95E5      | 8,99E4  | 9,94E9 | 8,98E8 | <b>3,3</b> |
| 23 | 39 | Tb <sub>0,95</sub> Eu <sub>0,05</sub> HY                                                                                                    | 26600                         | 4   | <b>31</b>   | <b>28775</b>   | <b>26975,5</b>                     | ∞           | ∞       | ∞      | ∞      | --         |
| 24 | 40 | cycEu-phTb                                                                                                                                  | 20501                         | 298 | <b>0,85</b> | <b>5,18445</b> | <b>5,02135</b>                     | 1,62        | 2,75E-1 | 5,12E6 | 8,68E5 | <b>4,3</b> |
| 25 | 41 | cycTb-phEu                                                                                                                                  |                               | 200 | <b>1,86</b> | <b>11,51</b>   | <b>11,1479</b>                     | 2,06        | 3,44E-1 | 9,94E9 | 1,66E9 | <b>4,3</b> |

<sup>1</sup> Two triplets of two metals were listed – 24570 (oa)19050 (dstp). The latter is involved (otherwise Sr = **8,657**)

|                     |               |                                                                                                               |                               |     |             |                              |                                    |             |         |          |         |            |
|---------------------|---------------|---------------------------------------------------------------------------------------------------------------|-------------------------------|-----|-------------|------------------------------|------------------------------------|-------------|---------|----------|---------|------------|
| 26                  |               | Tb <sub>0,95</sub> Eu <sub>0,05</sub> (btb)                                                                   | 23426                         | 14  | <b>2,85</b> | <b>2348,979</b><br><b>59</b> | <b>127,8934</b><br><b>7</b>        | ∞           | ∞       | 6,62     | 1,48    | <b>4,3</b> |
| 27                  | <sup>42</sup> | Tb <sub>0,95</sub> Eu <sub>0,05</sub> (pdc)                                                                   | 23809                         | 333 | <b>1,37</b> | <b>4,1519</b>                | <b>0,27089</b>                     | 2,49E6      | 1,26E7  | 1,01E6   | 5,11E6  | <b>3,4</b> |
| 28                  | <sup>43</sup> | Eu <sub>0,088</sub> Tb <sub>0,912</sub> (ad) <sub>0,5</sub> (phth)(H <sub>2</sub> O) <sub>2</sub>             | 20833<br>(phth)               | 303 | <b>0,42</b> | <b>5,01476</b>               | <b>4,3367</b>                      | 7,80        | 7,56E-1 | 3,97176E | 3,85E5  | <b>3,3</b> |
| 29                  | <sup>44</sup> | Ln(ad) <sub>0,5</sub> (phth)(H <sub>2</sub> O) <sub>2</sub> ; Ln =<br>3Eu <sup>III</sup> :10Tb <sup>III</sup> |                               | 303 | <b>0,59</b> | <b>5,01476</b>               | <b>4,3367</b>                      | 7,80        | 1,06    | 3,97E6   | 5,40E5  | <b>3,3</b> |
| 30                  | <sup>44</sup> | Eu <sub>0,01</sub> Tb <sub>0,99</sub> (bdc-F <sub>4</sub> )                                                   | 27465                         | 50  | <b>0,75</b> | <b>184,16</b>                | <b>222,4256</b><br><b>8</b>        | 1,95E8<br>8 | 6,56E85 | 9,77E39  | 3,29E37 | <b>3,3</b> |
| 31                  | <sup>45</sup> | Eu <sub>0,5</sub> Tb <sub>0,5</sub> (L) <sub>1</sub> @PMMA                                                    | 22420                         | 77  | <b>0,46</b> | <b>77,65222</b>              | <b>28,64065</b>                    | 2,45E1<br>6 | 3,94E14 | 9,278E25 | 1,49E24 | <b>3,3</b> |
| 32                  | <sup>46</sup> | Tb <sub>0,005</sub> Eu <sub>0,995</sub> @UiO-67-bpydc                                                         | 21505                         | 180 | <b>3,01</b> | <b>14,20988</b>              | <b>9,30434</b>                     | 6,84E3      | 2,21E3  | 1,28E11  | 4,15E10 | <b>4,4</b> |
| 33                  | <sup>24</sup> | {[Tb <sub>0,9064</sub> Eu <sub>0,0936</sub> (dcptp)(NO <sub>3</sub> )]·(H <sub>2</sub> O)} <sub>2</sub>       | 25445<br>(25217) <sup>1</sup> | 300 | <b>21,5</b> | <b>5,11556</b>               | <b>2,94918</b><br><b>(2,58469)</b> | 1,08E1<br>0 | 8,96E10 | 4,62E6   | 3,84E7  | <b>3,5</b> |
| 34 <sup>&amp;</sup> | <sup>26</sup> | Tb <sub>0,897</sub> Eu <sub>0,103</sub> (tcptpy)                                                              | 22321                         | 340 | <b>8,41</b> | <b>3,9827</b>                | <b>1,59217</b>                     | 3,39E3      | 1,79E4  | 7,60E5   | 4,01E6  | <b>5,5</b> |



& Re-plotted LIR with re-calculated Sr, which only reached 5.55%/K and is similar to the value (5.12%/K), predicted by the theory.

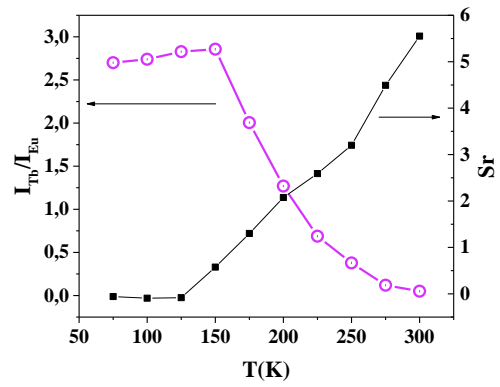

Supplement: d0dt02238a1.pdf [file d0dt02238a1.pdf]
